# Supplementary material for: Heterologous Expression of the Cysteine Proteinase Gene VaCP17 from the Cold-adapted Grapevine Vitis Amurensis Increases Cold Tolerance in Arabidopsis
Source: Research Square preprint supplement (doi:10.21203/rs.3.rs-973595/v1), 2021-11-02
Supplement: Supplementary file 1 [file 692e864c41399556c36144be.docx]

**Supplementary table 1**

| **Primer name** | **Forward primer (5’..3’)** | **Reverse primer (5’..3’)** |
| --- | --- | --- |
| VaCP17 | ATGGGTTTGTGCAGATCATCCTCAT | AGCACTGCTTCTCTTGCCATCAC |
| VaCP17-2300 | ACGGGGGACGAGCTCGGTACCATGGGTTTG TGCAGATCATCCTCAT | CTTGCTCACCATGGTGTCGACAGCACTGCT TCTCTTGCCATCAC |
| VvActin | CTATCCTTCGTCTTGACCTTGCTG | AGTGGTGAACATGTAACCCCTCTC |
| AtActin | GACCTTTAACTCTCCCGCTATG | GAGACACACCATCACCAGAAT |
| RT-CP17 | ATGAACACAACGCCGAGAACCG | ACCTCCGCTTAGCAGCAGTCC |
| AtCBF1 | CTGAAGTGAGAGAGCCAAACA | GAGTCAGCGAAGTTGAGACAT |
| AtCBF2 | GACCTTGGTGGAGGCTATTT | ATCCCTTCGGCCATGTTATC |
| AtCBF3 | TGACCTAAATGGCGACGATGT | TCCAAGTAACTCAAGTCGTCG |
| AtCOR15A | TTCCACAGCGGAGCCAAGCA | AGCGGCGTAGATCAACGACTTC |
| AtRD29A | GGTTGGGAGGATTAAAGGATG | AACAGTGGAGCCAAGTGATTG |
| AtNCED3 | GCCCGACTCATGCTATTCTAC | CATCCTCCGACATAGCCAATAA |
| AtAOC1 | ACCGAAAACCCCAGACCAAG | TTCCCACGCGTTTCTTGAGA |
| AtKIN1 | TGCCTTCCAAGCCGGTCAGA | CTGCCGCATCCGATACACTCTT |
| AtJAZ10 | CCTCGGACTTGAGAAGAAAC | TCGAAATCGCACCTTGAATA |
| pCambia2300-35sA | CACTTTATGCTTCCGGCTCGTATG | CAGGGTCAGCTTGCCGTAG |
| BD | CGGGTGTGGCTCCTATT | TCAGAAAGATCAAGGC |
| VaCP17-BD | ATGGCCATGGAGGCCGAATTCATGGGTTTGTGCAGATCATCCTCAT | ATGCGGCCGCTGCAGGTCGACAGCACTGCTTCTCTTGCCATCAC |
| VaNAC72-AD | GCCATGGAGGCCAGTGAATTCATGGGTGTACCGGAGACTGAC | CAGCTCGAGCTCGATGGATCCCTGCCTATATCCAAATCCACTAGGTT |
| VaCAM7-AD | CAGCTCGAGCTCGATGGATCCGAACGCCTCCTCCATTGTTCCTTG | GCCATGGAGGCCAGTGAATTCATGGATGGTGATTCGTGGAGTGC |
| VaDi19-AD | GCCATGGAGGCCAGTGAATTCATGGATGGTGATTCGTGGAGTGC | CAGCTCGAGCTCGATGGATCCTAACTTGTCATCGAAAATGGTGGACAAC |
| AD | CGTATGCAGCAATGAA | TCTGCAATAGTAACCT |
| VaCP17-NE | TCCGTCGACCTCGAGGGTACCATGGGTTTGTGCAGATCATCCTCAT | CTCCTACCCGGGAGCGGTACCAGCACTGCTTCTCTTGCCATCAC |
| VaNAC72-CE | GGGACTCTAGAGGATCTCGAGATGGGTGTACCGGAG ACTGAC | ATCGTATGGGTACATGGTACCCTGCCTATATCCAAATCCACTAGGTT |
| VaCAM7-CE | GGGACTCTAGAGGATCTCGAGATGGCCGATCAGCTCACTGAC | ATCGTATGGGTACATGGTACCGAACGCCTCCTCCATTGTTCCT |
| VaDI19-CE | GGGACTCTAGAGGATCTCGAGATGGATGGTGATTCGTGGAGTGC | ATCGTATGGGTACATGGTACCTAACTTGTCATCGAAAATGGTGGACAAC |
| PBI221-35s | CTATCCTTCGCAAGACCCTTCCT | GATAATCATCGCAAGACCGGCAAC |
